# Supplementary figures and images for: RNA-Sequencing of Tumor-Educated Platelets, a Novel Biomarker for Blood-Based Sarcoma Diagnostics
Source: MDPI journal article supplement (doi:10.3390/cancers12061372), 2020-05-27

Figure S1

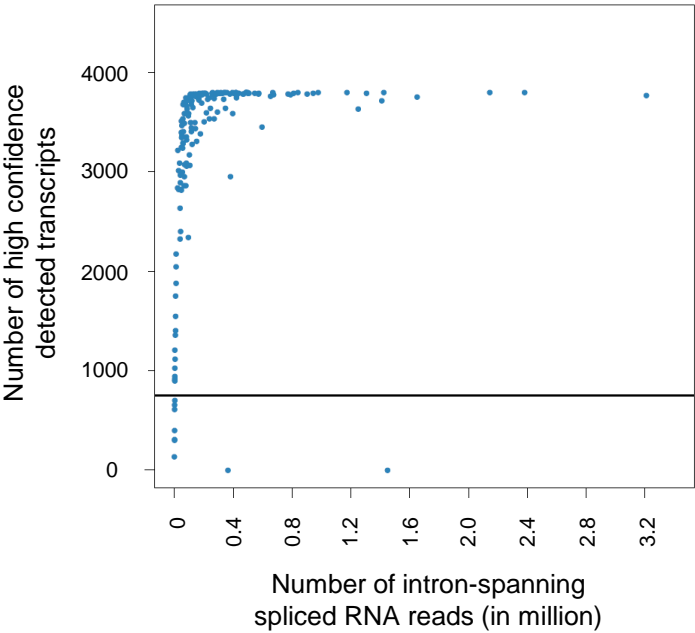

(a) Confidence plot

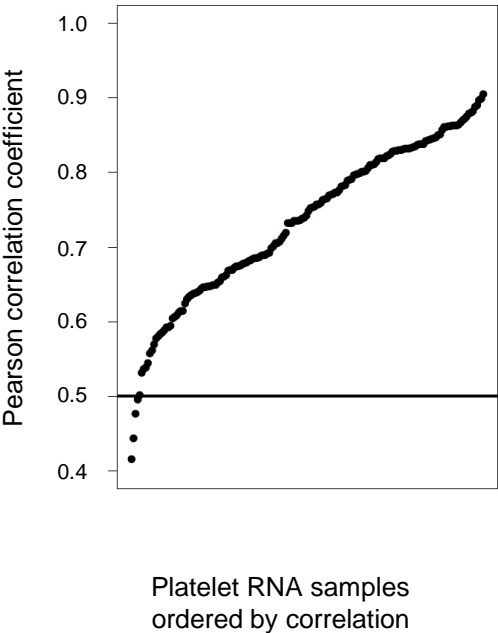

(b) Correlation analysis

Figure S2

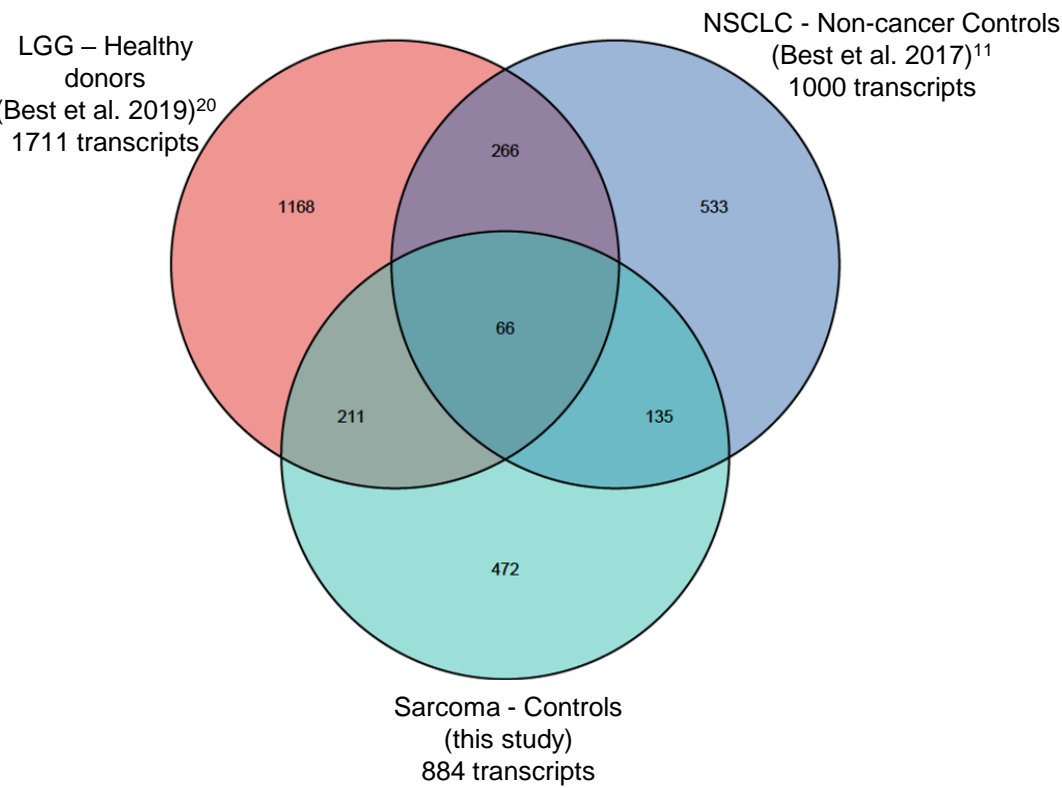

Supplement: s1 [file s1]
